# Supplementary material
Source: PubMed Central journal article supplement (PMC4629841)

APPENDIX

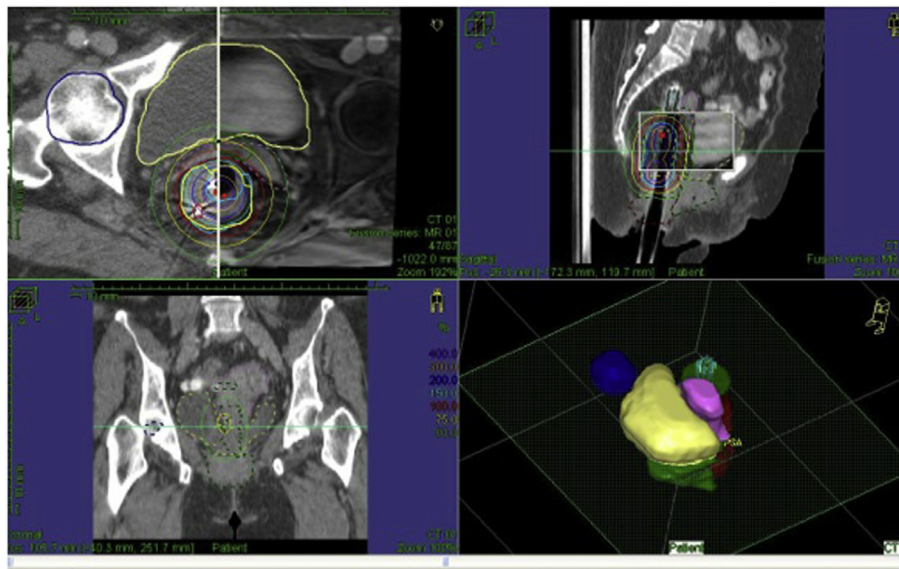

Supplementary Figure 1.

Supplement: NIHMS732986-supplement-01.pdf [file NIHMS732986-supplement-01.pdf]
